# Supplementary material for: First Report and Comparative Genomic Analysis of Mycoplasma capricolum subsp. capricolum HN-B in Hainan Island, China
Source: MDPI journal article supplement (doi:10.3390/microorganisms10112298), 2022-11-19
Supplement: s1 [file s1]

**Figure S1. Variation type display diagram**

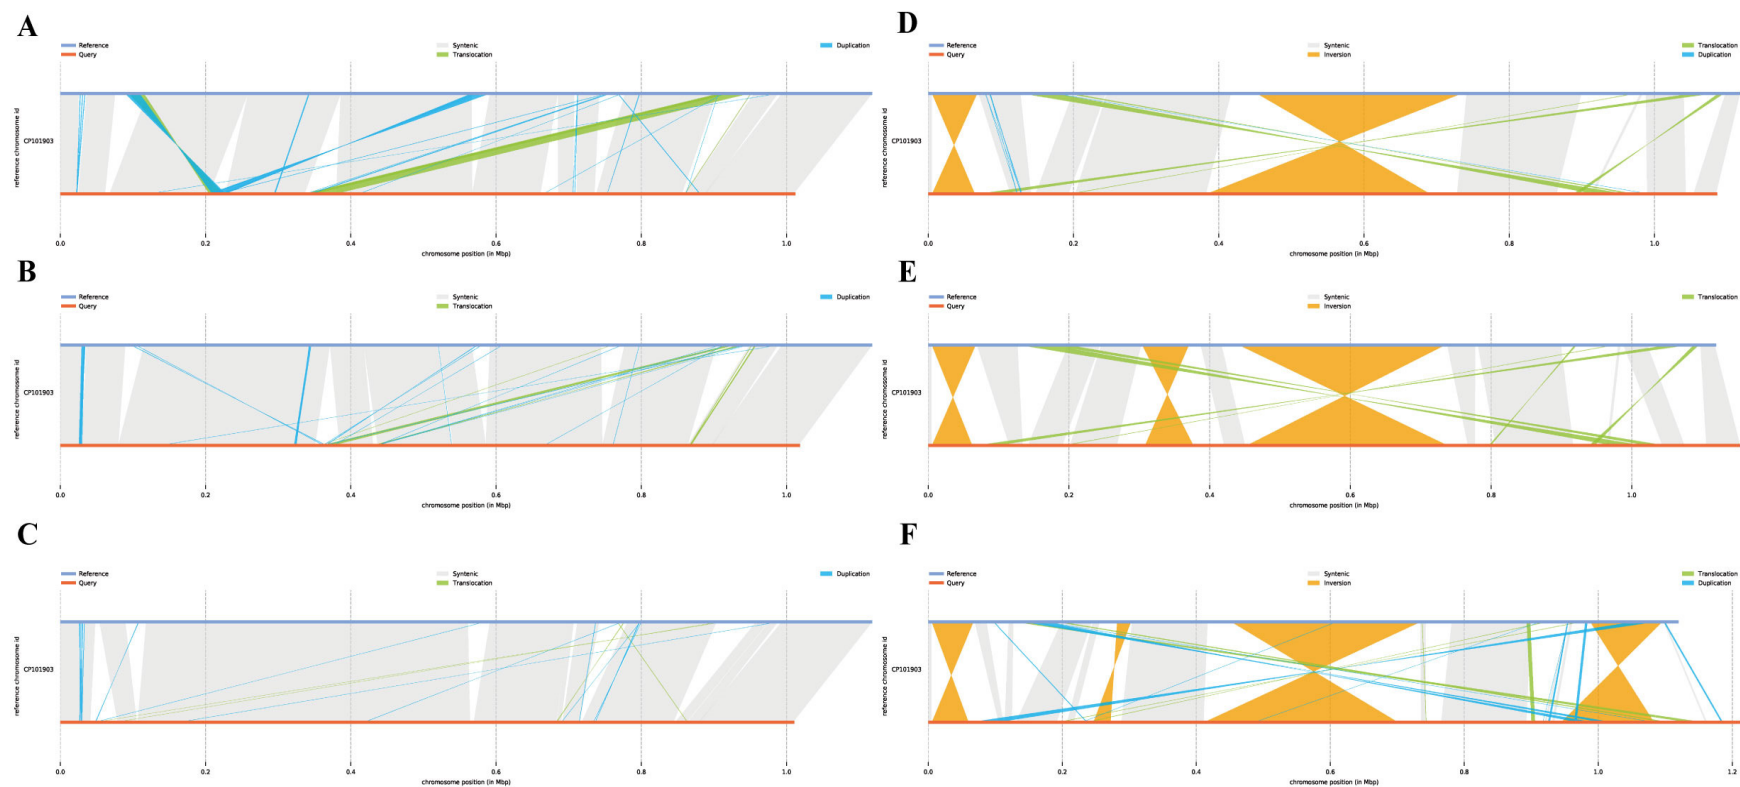

**Figure S1. Variation type display diagram**

- (A) Variation type display diagram of Mcc ATCC 2734 vs Mcc HN-B
- (B) Variation type display diagram of Mccp M1601 vs Mcc HN-B
- (C) Variation type display diagram of Ml PG50 vs Mcc HN-B
- (D) Variation type display diagram of Mmc HN-A vs Mcc HN-B
- (E) Variation type display diagram of MmmLC 95010 vs Mcc HN-B
- (F) Variation type display diagram of MmmSC PG1 vs Mcc HN-B
